# Supplementary figures and images for: The Circadian Clock Regulates Metabolic Phenotype Rewiring Via HKDC1 and Modulates Tumor Progression and Drug Response in Colorectal Cancer
Source: PubMed Central journal article supplement — eBioMedicine. 2018 Jul 10;33:105–21. doi: 10.1016/j.ebiom.2018.07.002 (PMC6085544; doi:10.1016/j.ebiom.2018.07.002), 2018-07-10

**a**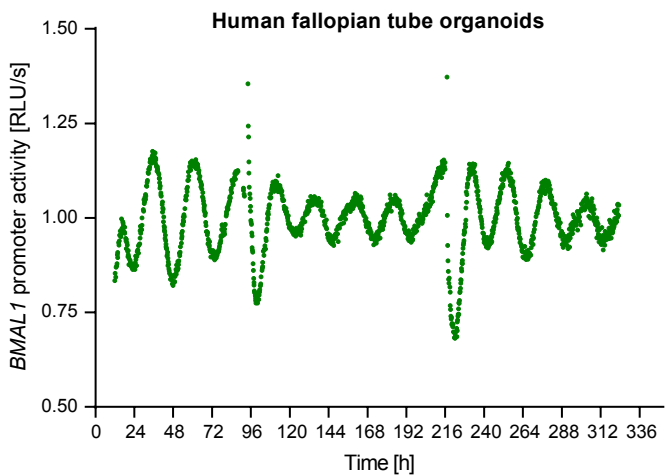**b**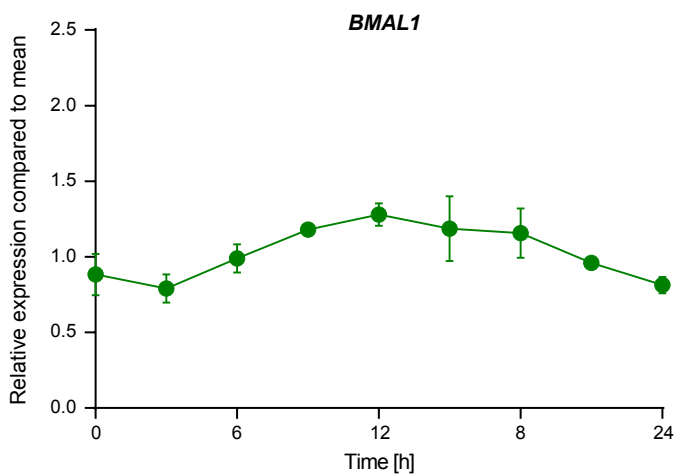**c**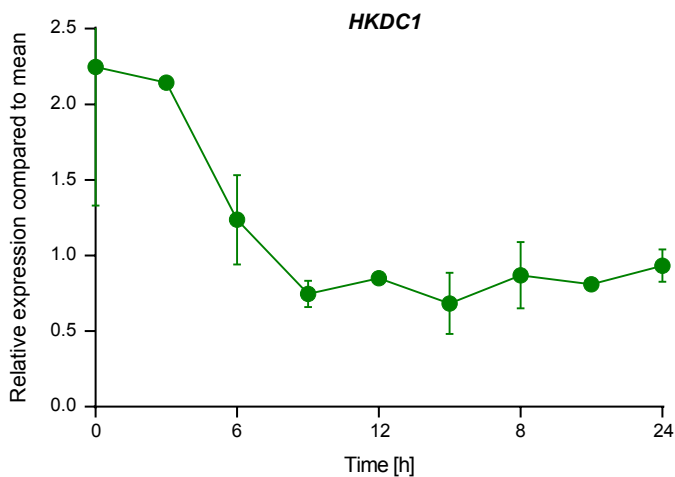

Supplement: mmc2.pdf [file mmc2.pdf]

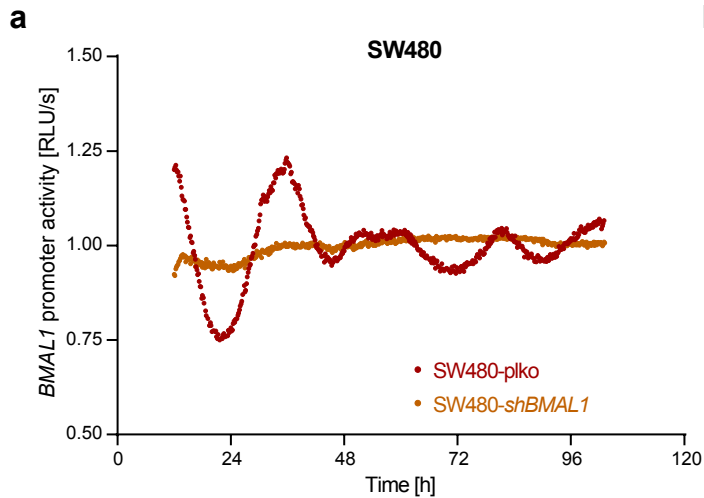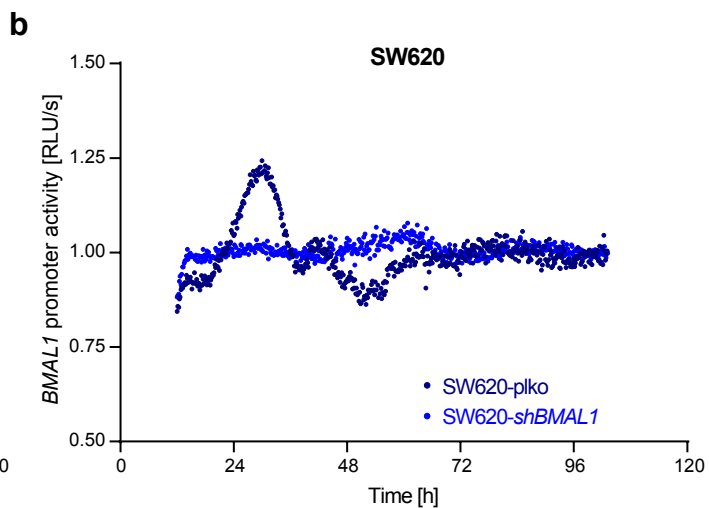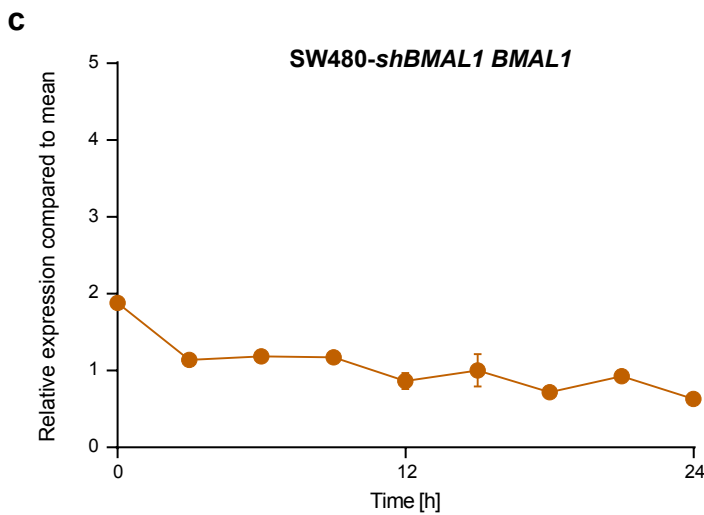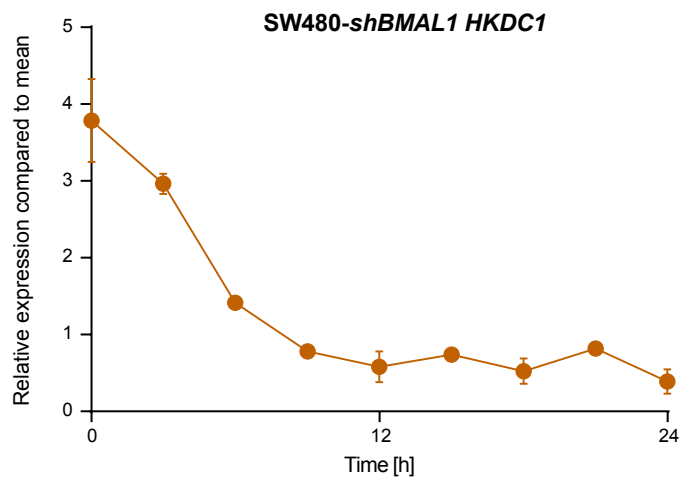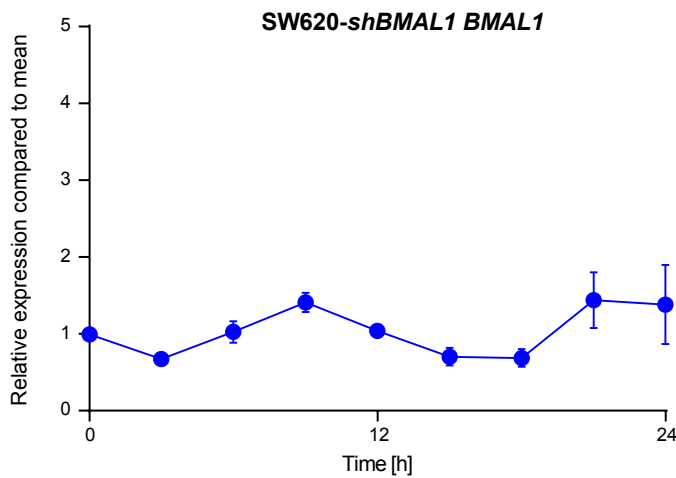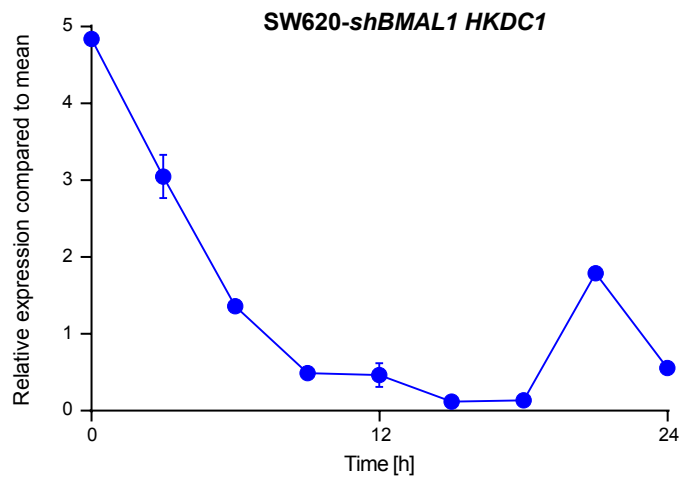

Supplement: mmc3.pdf [file mmc3.pdf]

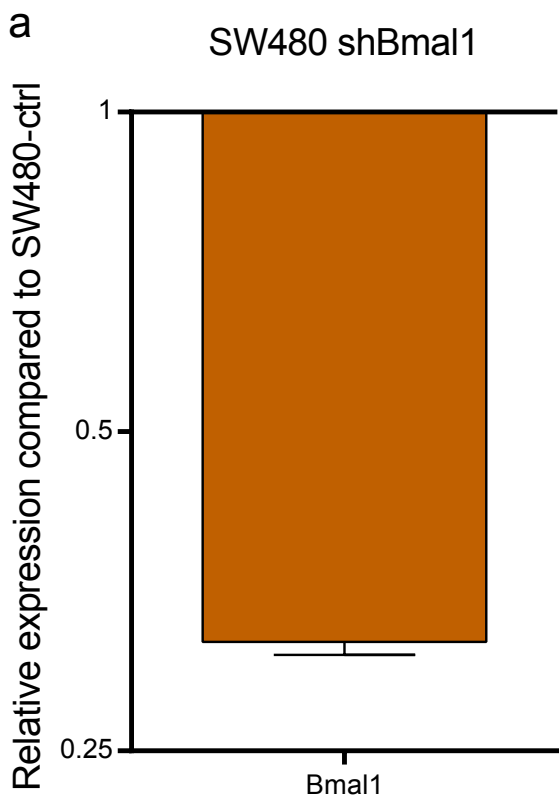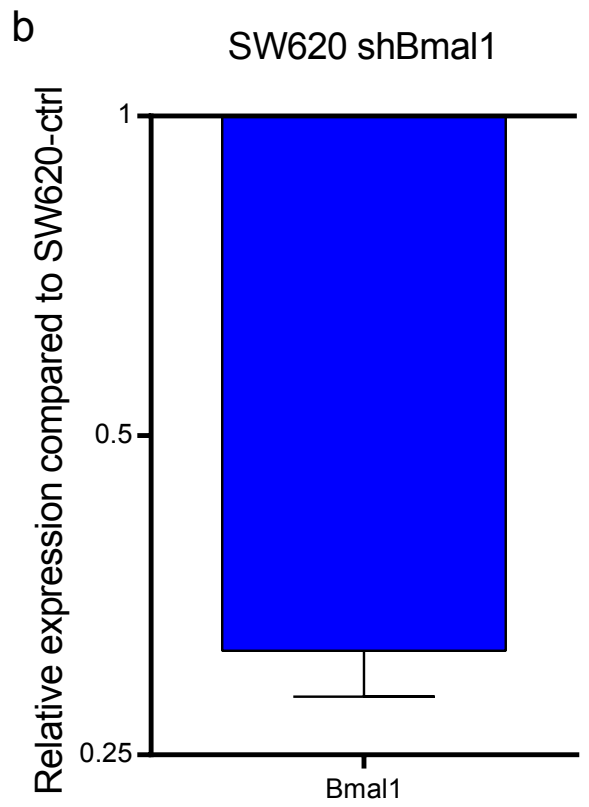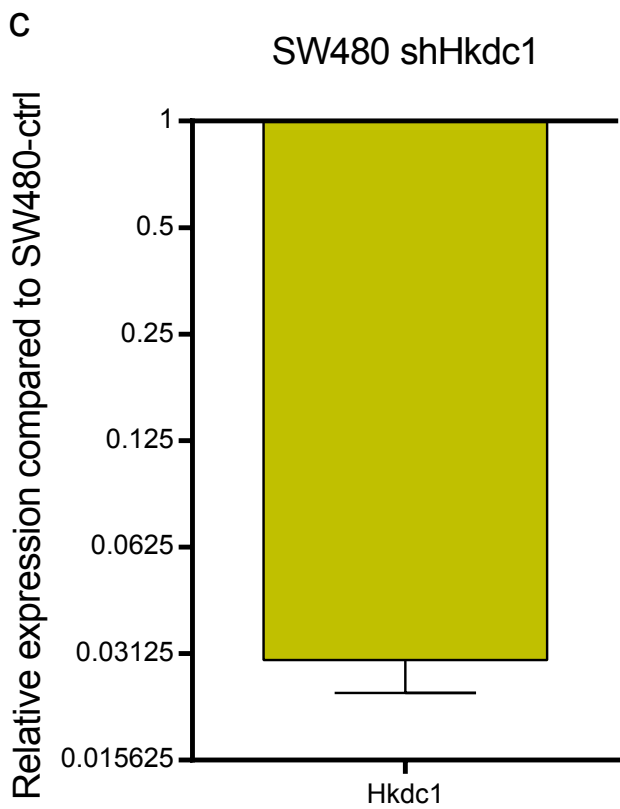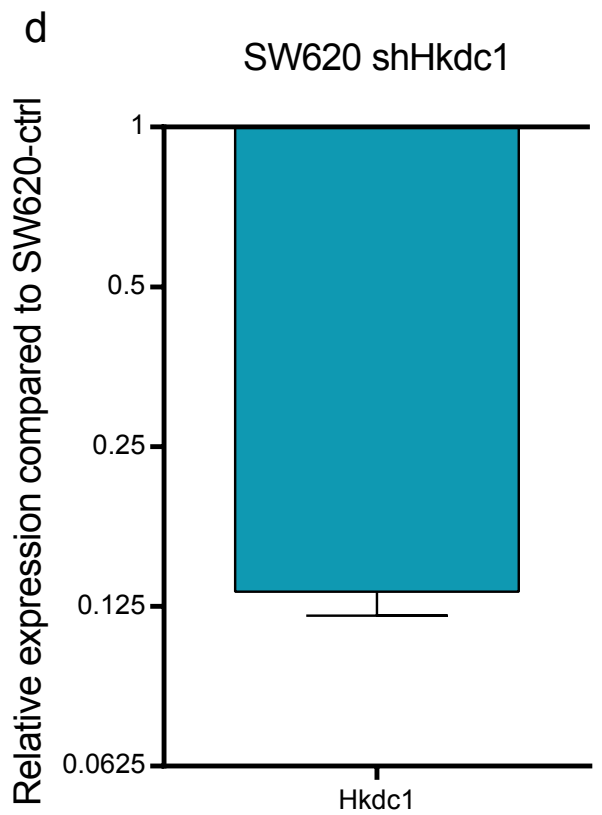

Supplement: mmc4.pdf [file mmc4.pdf]

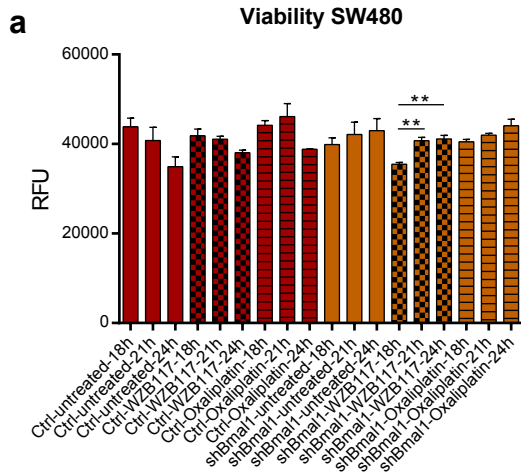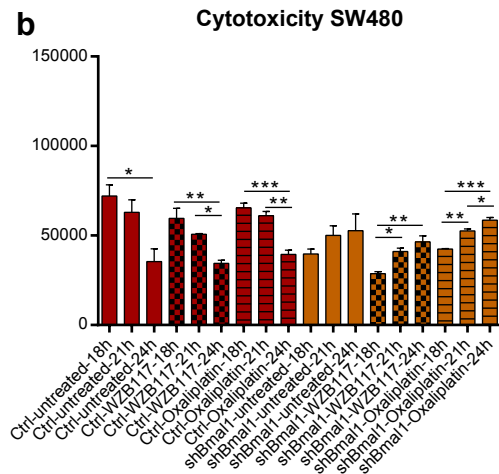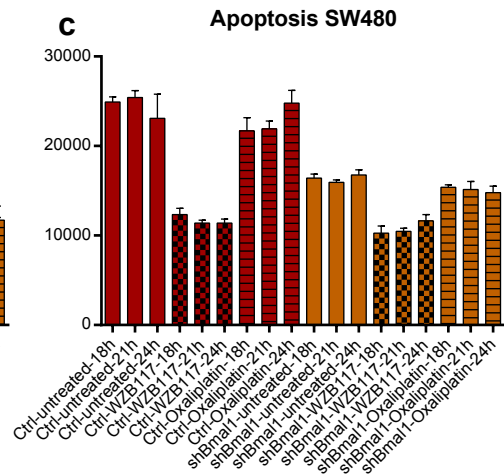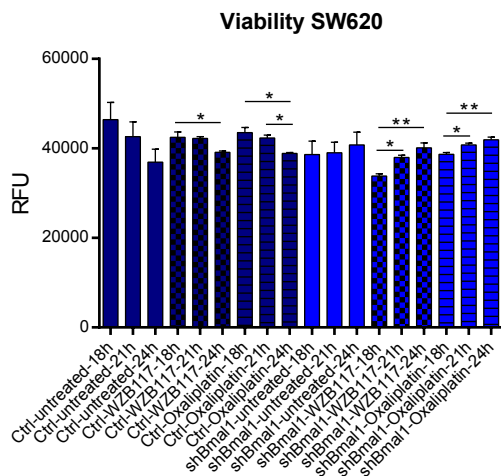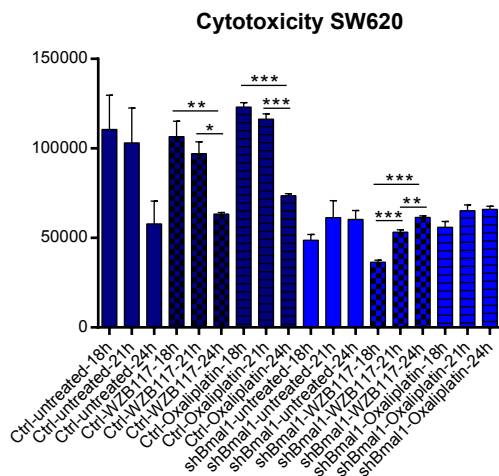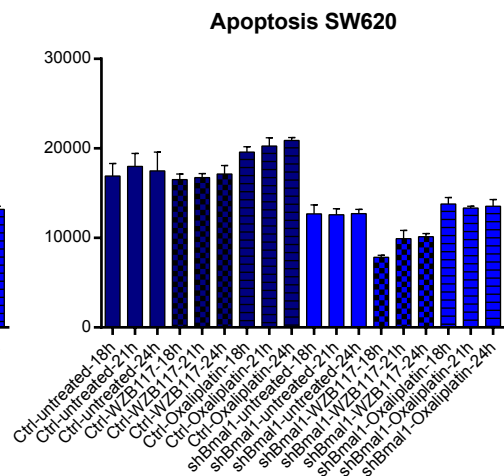

Supplement: mmc5.pdf [file mmc5.pdf]

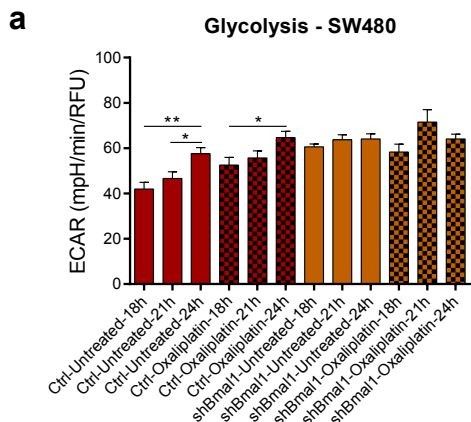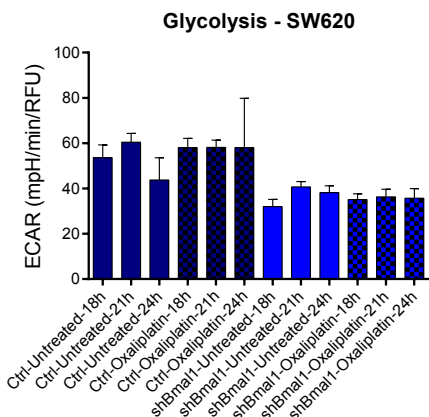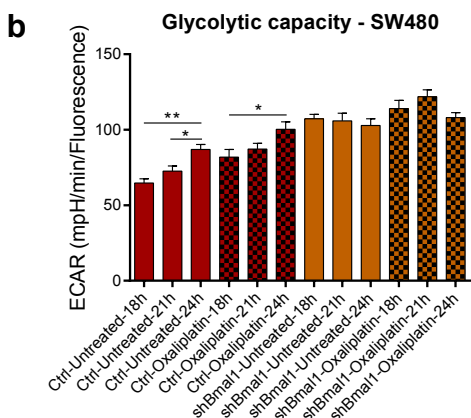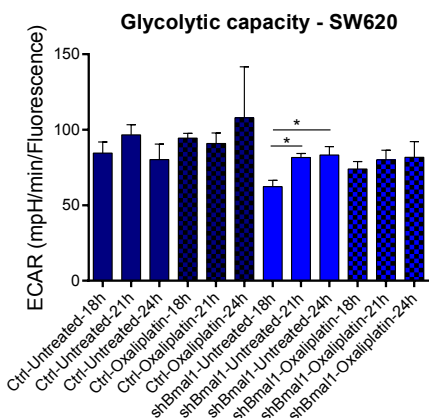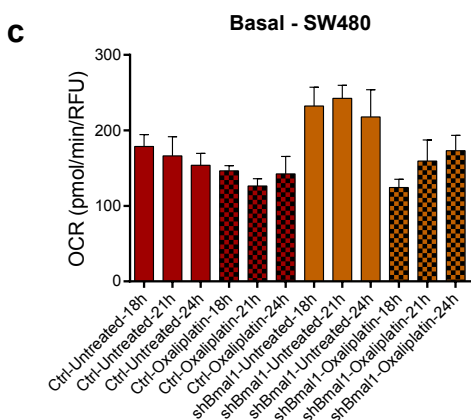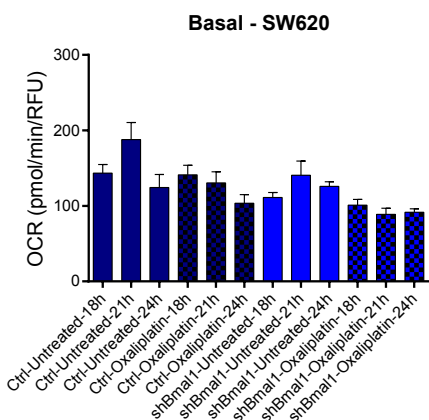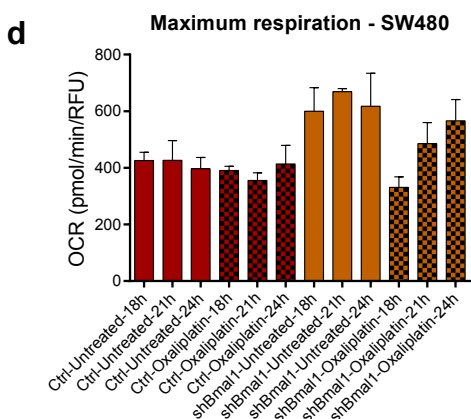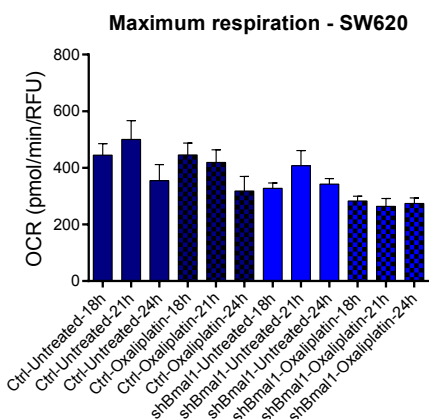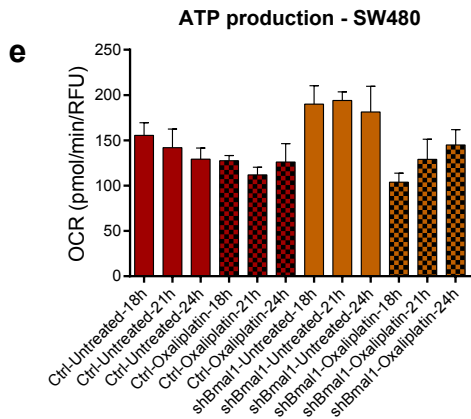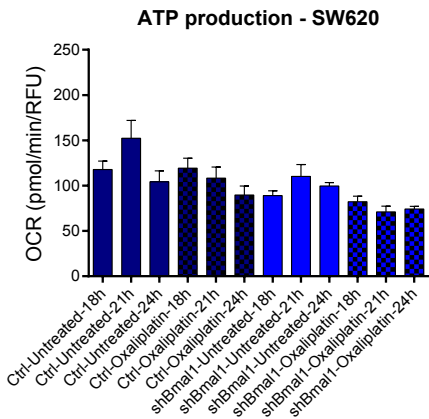

Supplement: mmc6.pdf [file mmc6.pdf]

# WZB117

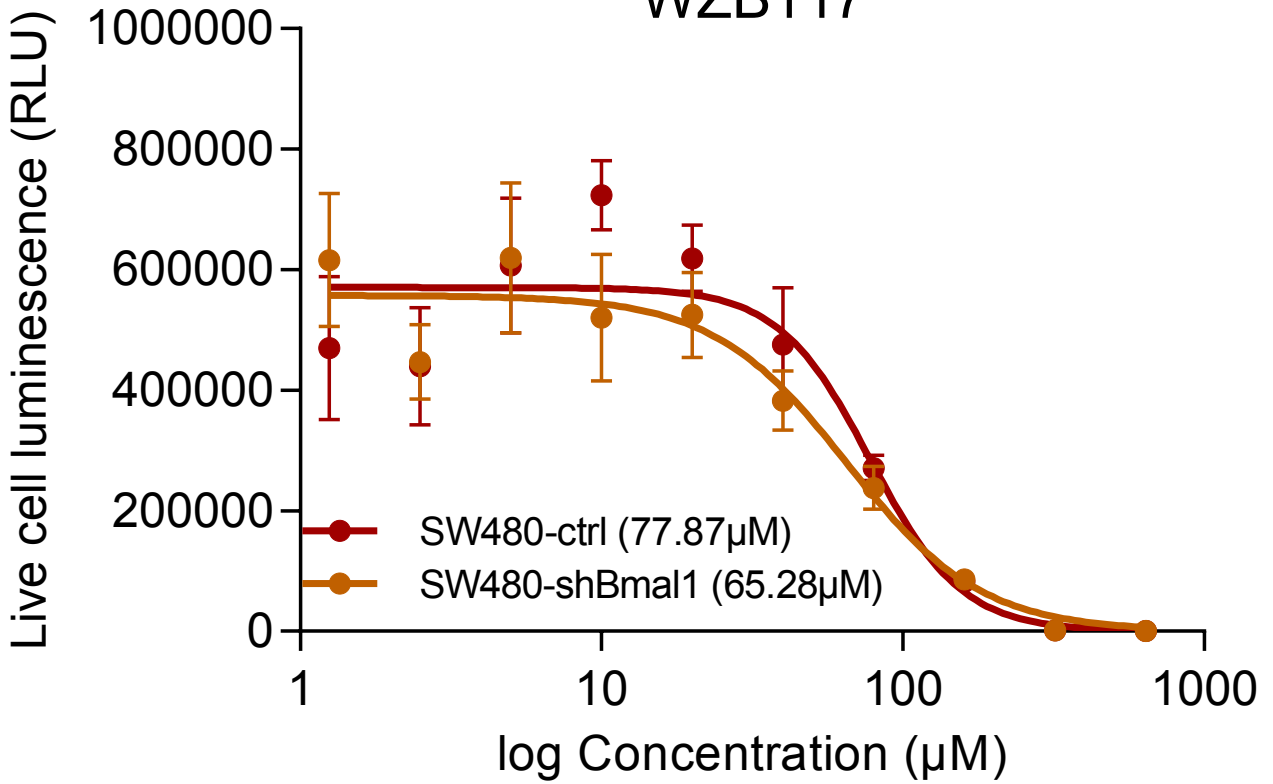

# WZB117

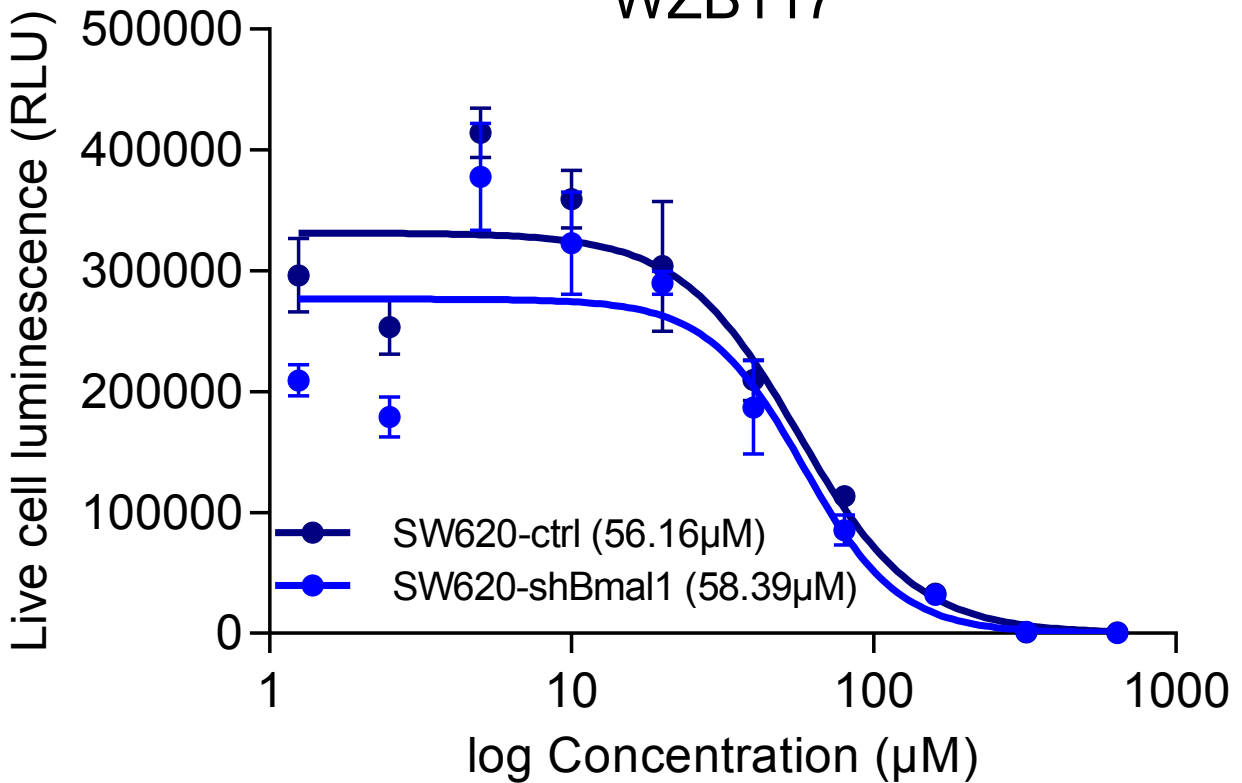

Supplement: mmc7.pdf [file mmc7.pdf]
